# Supplementary material
Source: ML conference proceedings conference paper supplement (https://proceedings.neurips.cc/paper_files/paper/2022/hash/7103444259031cc58051f8c9a4868533-Abstract.html)
Supplement: Supplementary file 1 [file 7103444259031cc58051f8c9a4868533-Supplemental-Conference.zip]

Archive with 2 entries (2 files):
- FasterRisk_NeurIPS_appendix.pdf
- __MACOSX/._FasterRisk_NeurIPS_appendix.pdf
